# Supplementary material
Source: PubMed Central journal article supplement (PMC4162810)

## Supplementary Figures and Tables

### Metronomic cyclophosphamide schedule-dependence of innate immune cell recruitment and tumor regression in an implanted glioma model

Junjie Wu and David J. Waxman

Division of Cell and Molecular Biology, Department of Biology,  
Boston University, 5 Cummington Mall, Boston, MA 02215

**Supplemental Table S1.** Forward and reverse primer sets used for qPCR for the indicated mouse gene transcripts. Gene names are shown in parentheses. Sequences for the following primer sets were reported previously [21]: TNF receptor superfamily member 6 (*Fas*), natural cytotoxicity triggering receptor 1 (Nkp46), perforin 1 (*Prf1*), granzyme B (*Gzmb*), killer cell lectin-like receptor subfamily K, member 1 (Nkg2d or *Klrk1*), Cd68 antigen (*Cd68*), Cd74 antigen (*Cd74*), Cd207 antigen (*Cd207*), EGF-like module containing, mucin-like, hormone receptor-like sequence 1 (*Emr1*). Fas ligand (*Fasl*) was reported in [22].

**Supplemental Fig. S1.** Time course of changes in tumor expression levels of the indicated genes assayed by qPCR. The experiments were conducted as in Fig. 2, except that *Icam2* and *Vcam1* were assayed using pooled cDNA from n = 4 to 6 individual tumors.

**Supplemental Fig. S2.** Individual GL261 tumor growth curves from four metronomic CPA treatment schedules (CPA/6d, CPA/9d, CAP/6-9d, and CPA(210)/9d). Rebounding and regressing tumor numbers are as indicated.

**Supplemental Fig. S3.** Body weights for GL261-bearing mice treated on the indicated metronomic CPA schedules. Data are normalized to the first treatment day (day 0). Body weight data are mean  $\pm$  SEM, n = 2, 4, 6, 5, 7 mice for untreated, CPA/6d, CPA/9d, CPA(210)/9d, CAP/6-9d, CPA/12d treatment groups, respectively. The CPA/12d and CPA/9d schedules were associated with higher total body weight than the CPA/6d or CPA(210)/9d schedules; however, these increases primarily reflect the increased tumor sizes in the CPA/12d and CPA/9d treated mice.

**Supplemental Table S1.**

| <b>Gene</b>                                  | <b>Primer #</b> | <b>Primer Sequence (5' to 3')</b>      |
|----------------------------------------------|-----------------|----------------------------------------|
| interleukin 15 (IL15)                        | 5095            | forward: GAAGGCTGAGTTCCACATCTAACA      |
|                                              | 5096            | reverse: CTGCTGACATGGGTTTCTGTGTT       |
| interleukin 18 (IL18)                        | 5099            | forward: TGTGACCCTCTCTGTGAAGGATAGT     |
|                                              | 5100            | reverse: GTTTCTGAAAGAATATGAGATCACTTTG  |
| colony stimulating factor 1 (Csf1)           | 5089            | forward: GAGGCTCCAGGAACTCTCCAAT        |
|                                              | 5090            | reverse: CAAGGAGATTCTTTGTTTCATTAAAGAAG |
| intercellular adhesion molecule 1 (Icam1)    | 4842            | forward: CAAGGGCTGGCATTGTTCTCT         |
|                                              | 4843            | reverse: GGGTGTGCGAGCTTTGGGATG         |
| vascular endothelial growth factor A (VEGFA) | 3612            | forward: CGACAGAAGGAGAGCAGAAGTCC       |
|                                              | 3613            | reverse: GACGGCAGTAGCTTCGCTGG          |
| chemokine (C-X-C motif) ligand 10 (Cxcl10)   | 3373            | forward: ACCATGAACCCAAGTGCTGCC         |
|                                              | 3374            | reverse: CTATGGCCCTCATTCTCACTGGCC      |
| Toll-like receptor 7 (Tlr7)                  | 5141            | forward: GGATGATCCTGGCCTATCTCTGA       |
|                                              | 5142            | reverse: TCTCTTCCGTGTCCACATCGA         |
| intercellular adhesion molecule 2 (Icam2)    | 4846            | forward: TTGCTGGAGCCTGTCTCTTCTTA       |
|                                              | 4847            | reverse: GCAGTTGGTGCTGCAGTTGAT         |
| vascular cell adhesion molecule 1 (Vcam1)    | 4840            | forward: TCTGGGAAGCTGGAACGAAGT         |
|                                              | 4841            | reverse: CAGCCTGTAAACTGGGTAAATGTCT     |
| chemokine (C-X-C motif) ligand 9 (Cxcl9)     | 5076            | forward: GAAGAAGCTGATGAAAGAATGGGAA     |
|                                              | 5077            | reverse: ATTCAGGGTGCTTGTGGTAAAGTAA     |
| chemokine (C-X-C motif) ligand 11(Cxcl11)    | 4878            | forward: GCTGAGATGAACAGGAAGGTCACA      |
|                                              | 4879            | reverse: TGCCATTTTGACGGCTTTCAT         |



Fig. S2A, S2B

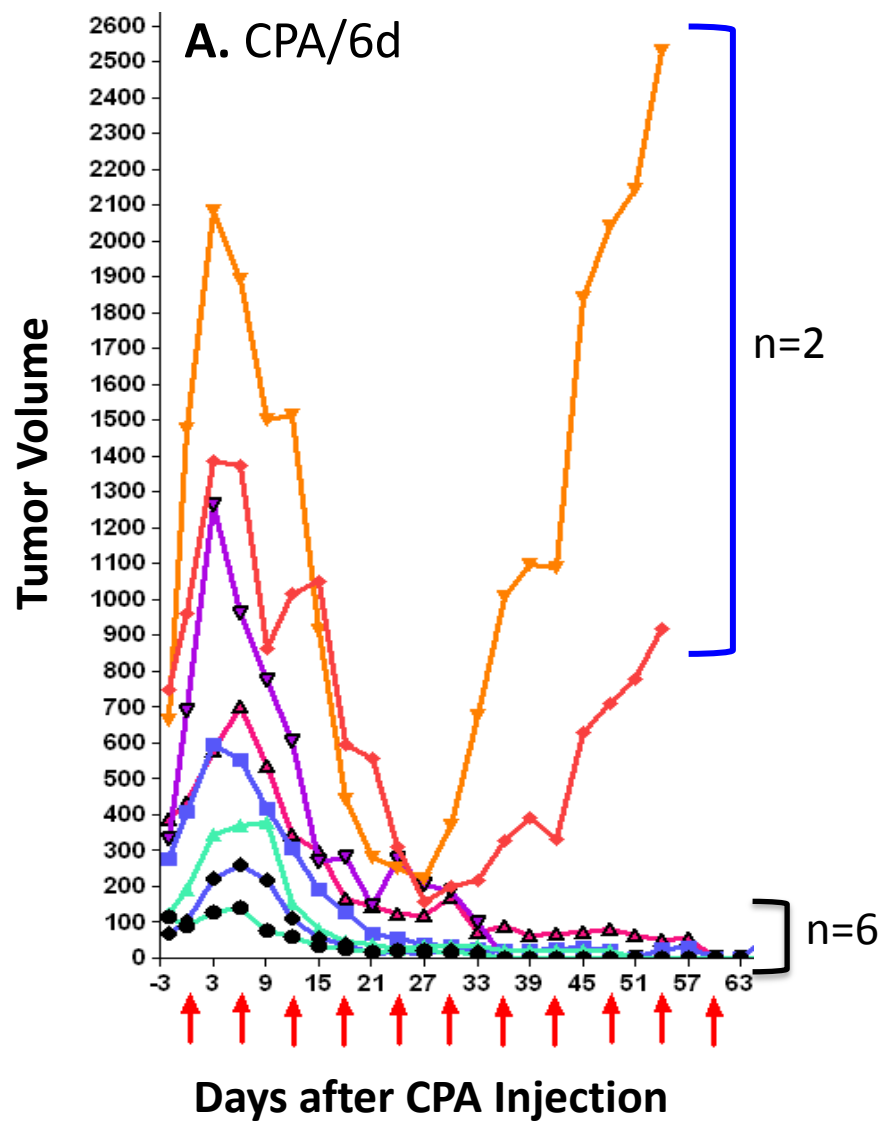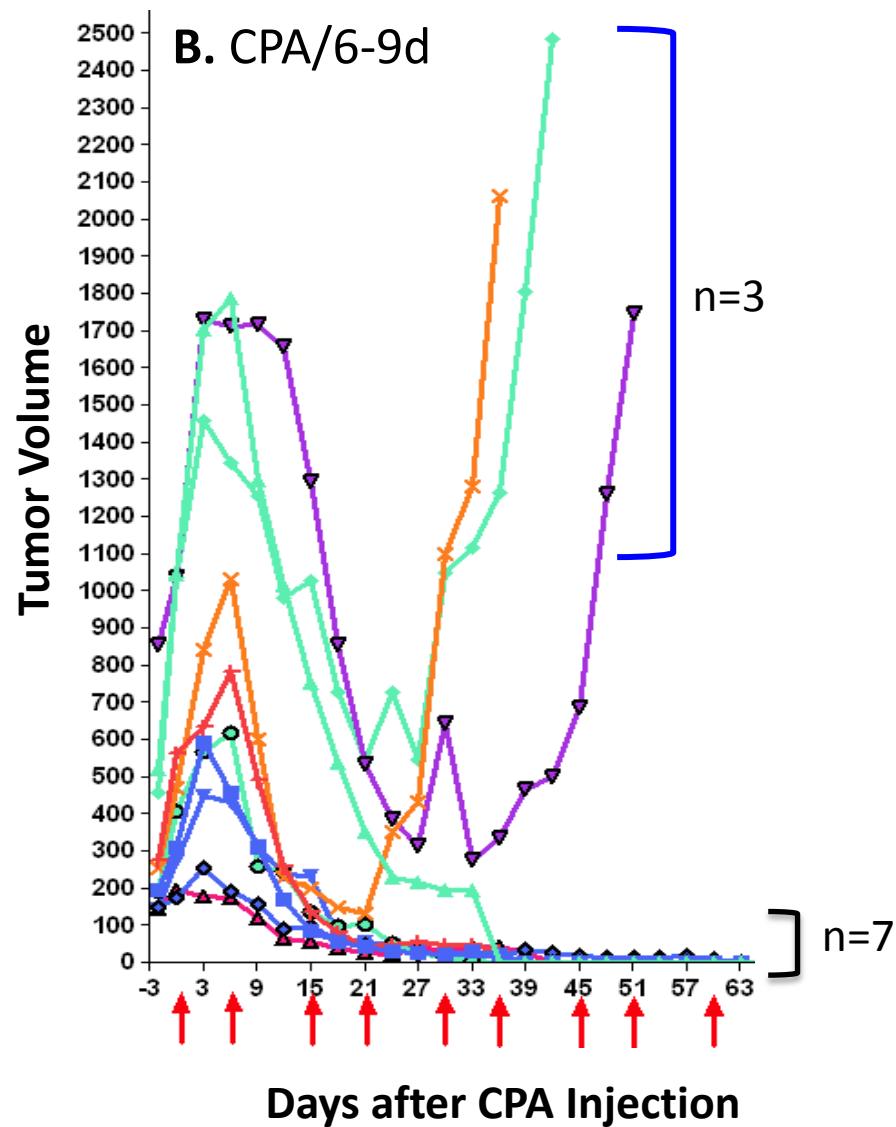

C. CPA/9d

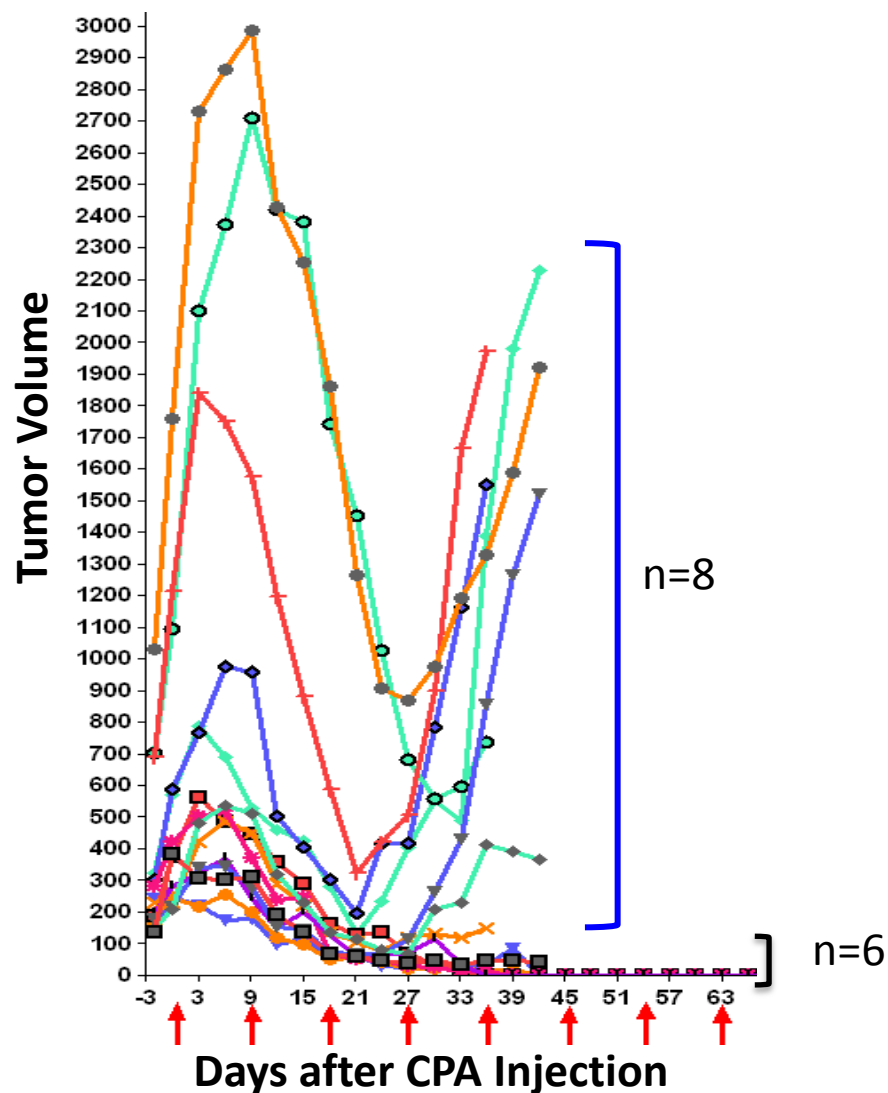

D. CPA(210)/9d

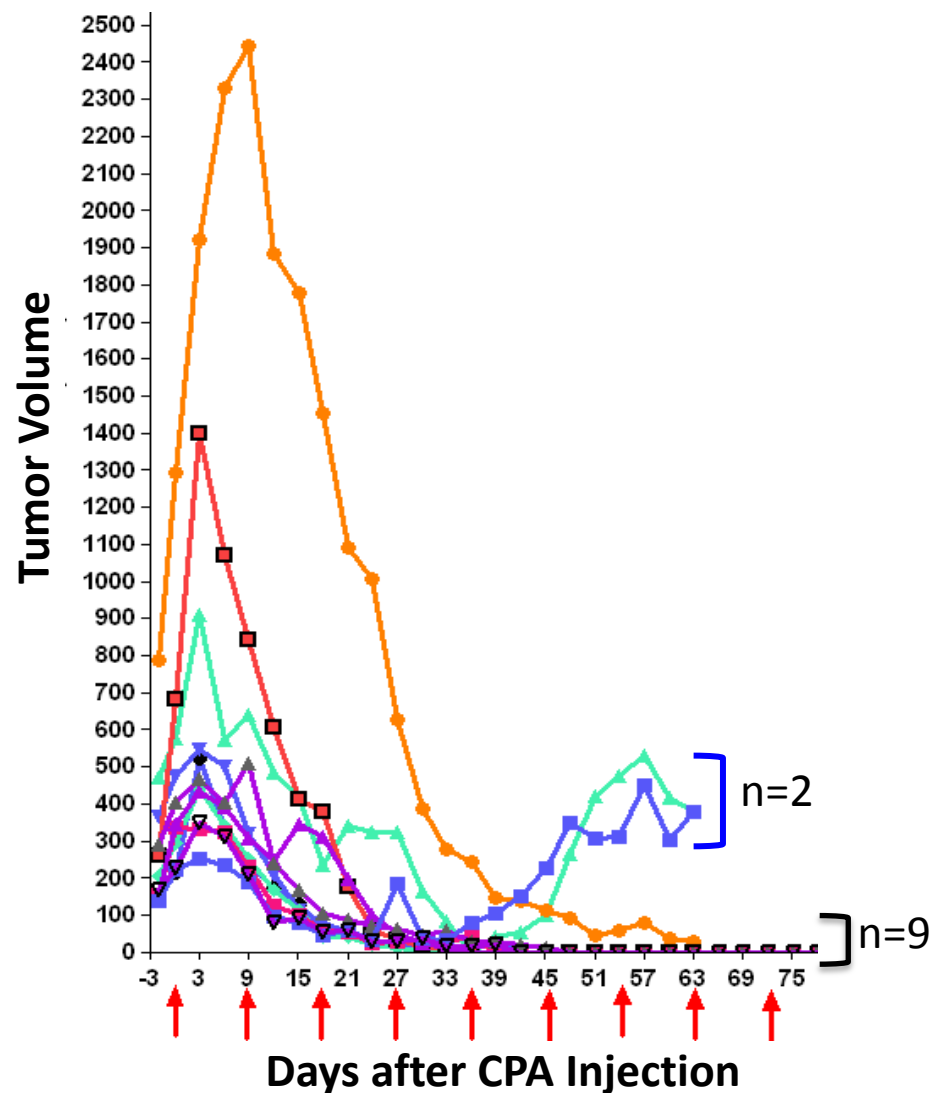

Fig. S3

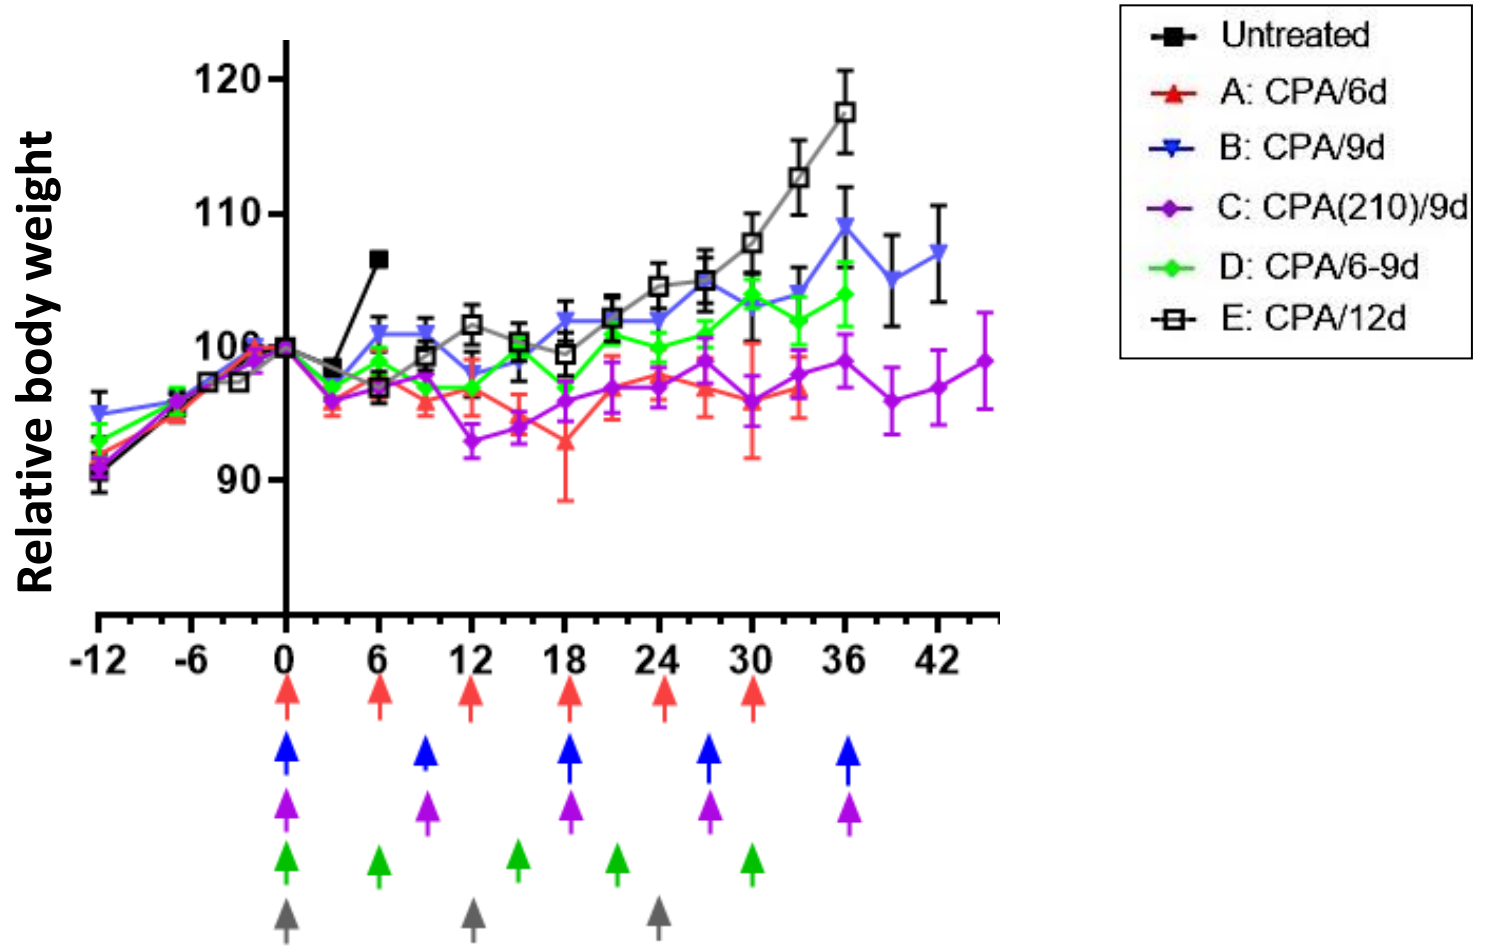

Supplement: NIHMS616845-supplement-01.pdf [file NIHMS616845-supplement-01.pdf]
